# Supplementary material for: An improved predictive recognition model for Cys2-His2 zinc finger proteins
Source: PubMed Central journal article supplement — Nucleic Acids Res. 2014 Feb 12;42(8):4800–12. doi: 10.1093/nar/gku132 (PMC4005693; doi:10.1093/nar/gku132), 2014-02-12
Supplement: supp_gku132_nar-03543-h-2013-File007.pdf [file supp_gku132_nar-03543-h-2013-File007.pdf]

### **Supplementary Table 1.**

Sequences of OPEN-selected two-finger modules, B2H *lacZ* activity, expected binding sites and B1H determined specificity. – See attached Excel sheet.

## **Supplementary Table 2.**

Archive of 1209 one-finger and 678 two-finger modules used to train our RF models. Each motif is represented as a PFM with the name of the clone, the amino acids present at positions -1, +2, +3 and +6, and the amino acids at positions -1 through 6 in the recognition helix. For two finger modules the amino acids in the N-terminal finger are listed first. – See attached txt file.

### Supplementary Table 3.

Comparison of the mean and median mean squared error (MSE) values for the prediction of the ZFP specificities in Supplementary Figure 6.

| <b>Model</b>                      | <b>Mean MSE</b> | <b>Median MSE</b> |
|-----------------------------------|-----------------|-------------------|
| Average One-Finger & Multi-Finger | 0.045           | 0.044             |
| Multi-Finger                      | 0.047           | 0.050             |
| One-Finger                        | 0.048           | 0.047             |

#### Supplementary Table 4.

Comparison of the mean squared error (MSE) values for the motifs for our average ZFModel prediction or the ZF\_Princeton prediction (79) to the determined SELEX data for each ZFP (105).

| <b>ZFP IDs</b> | <b>Avg Model</b> | <b>ZF_Princeton</b> |
|----------------|------------------|---------------------|
| AAVS1_ZFN-L    | 0.063            | 0.073               |
| AAVS1_ZFN-R    | 0.059            | 0.132               |
| OCT4_ZFN1-L    | 0.044            | 0.064               |
| OCT4_ZFN1-R    | 0.051            | 0.088               |
| OCT4_ZFN2-L    | 0.016            | 0.039               |
| OCT4_ZFN2-R    | 0.044            | 0.097               |
| Pitx3_ZFN-L    | 0.013            | 0.044               |
| Pitx3_ZFN-R    | 0.056            | 0.158               |



## Supplementary Figure 1.

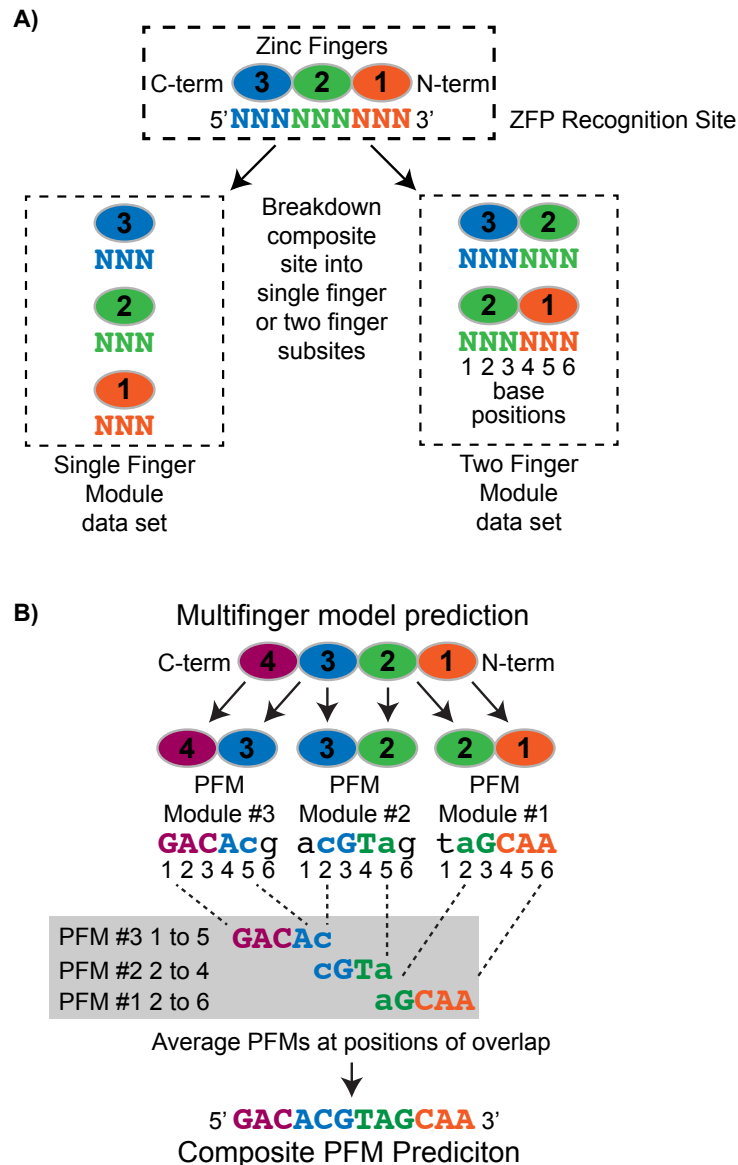

A) Schematic overview of the motif breakdown used to construct the one finger and two finger data sets for ZFModels training, where a three finger ZFP is broken down into 3 one finger modules, each with a 3 bp motif, or 2 two finger modules, each with a 6 bp motif. B) Overview of Multifinger motif construction method. Each ZFP is deconstructed into a set of overlapping two finger modules. Based on the specificity determinants that are present in each two finger module, ZFModels predicts a PFM. These PFMs are merged together at base position 2 and/or 5 of each motif, which is the base position contacted by the specificity determinant at position +3 of the recognition helix. The specificity at the positions of overlap (5 and 2 of overlapping motifs) is generated by averaging the PFMs at this position.

## Supplementary Figure 2.

Organized B1H motifs of the OPEN 2FMs. See following motifs. DNA-binding specificities of the OPEN 2 Finger modules were determined using CV-B1H method. The clone ID, recognition helix sequence and stringency of the selection used to recover the binding sites that were incorporate into each GRaMS motif are displayed at the top of each image. Amino acid sequences are listed for the N-terminal finger followed by the C-terminal finger (positions -1 through 6). Most of these modules were characterized at both 1 mM and 2 mM 3-amino triazole in the B1H system (85). One clone, R27-2, is marked with “\*”, where and the two motifs are very different at each stringency. Because of this discrepancy neither were included in the training data. R27-2 has the same sequence as R55-1, which we used for training, but both of these motifs are quite different.

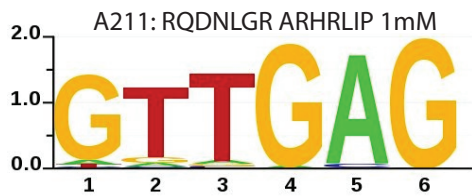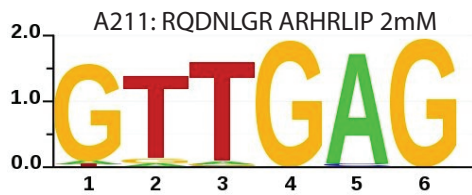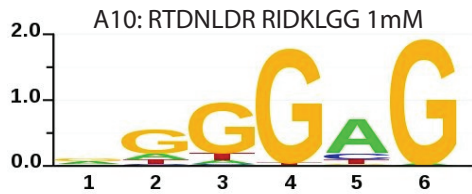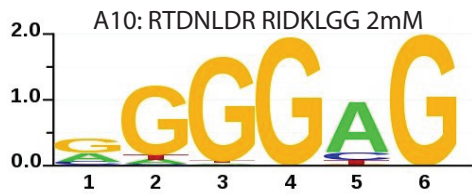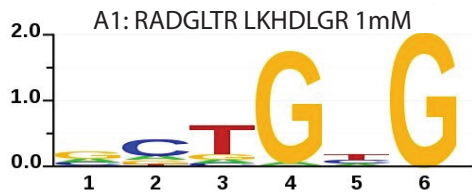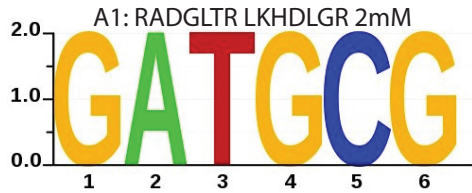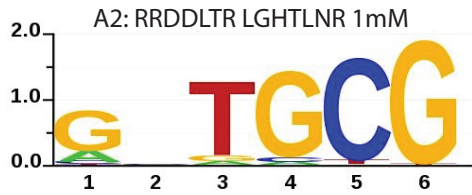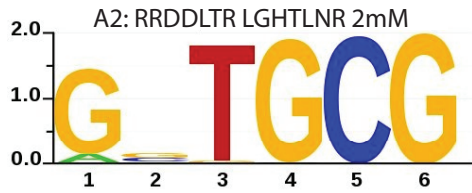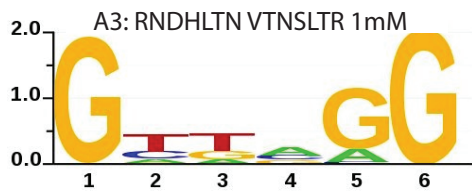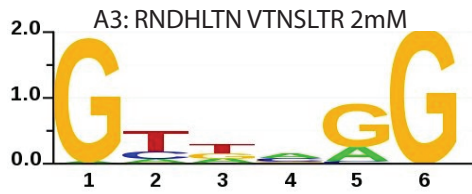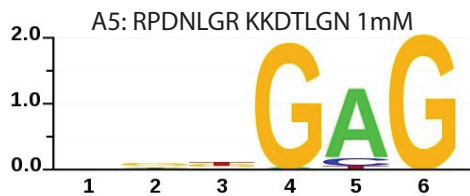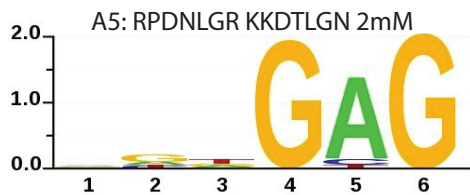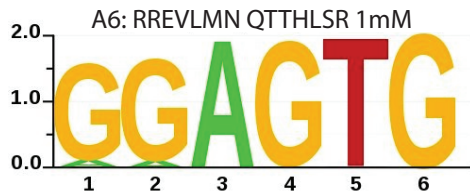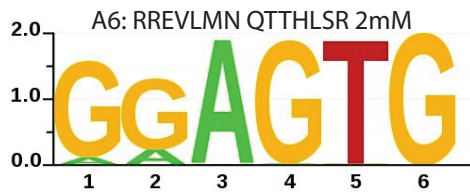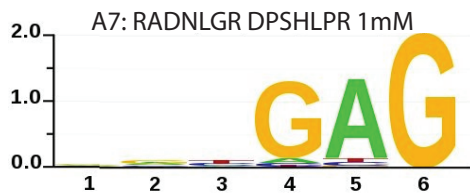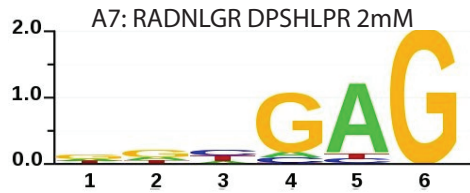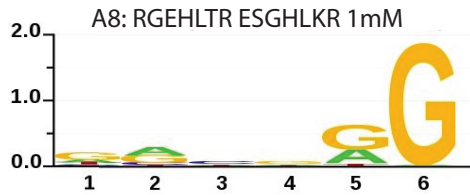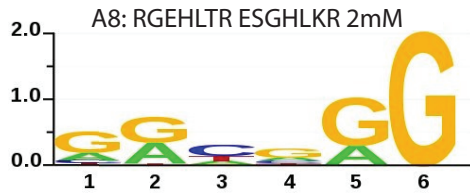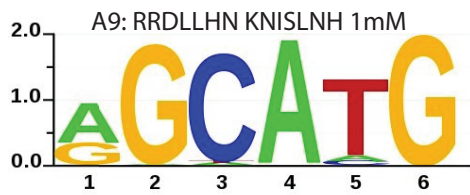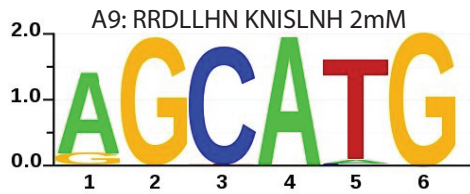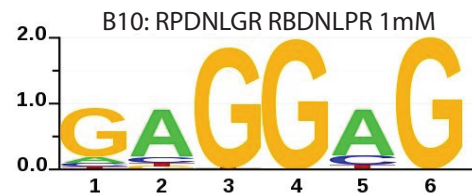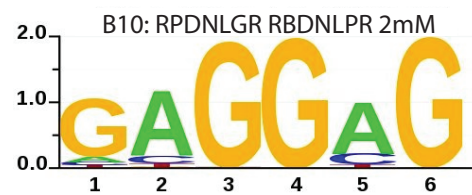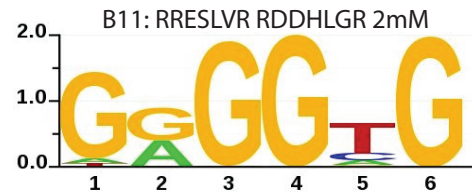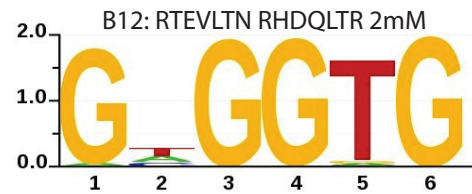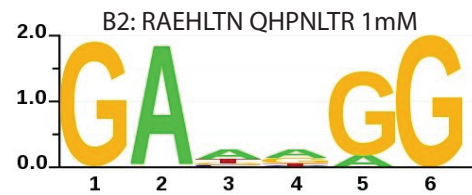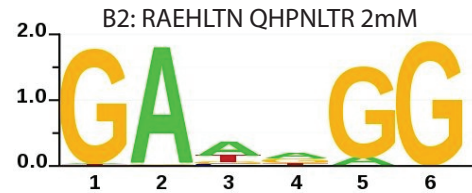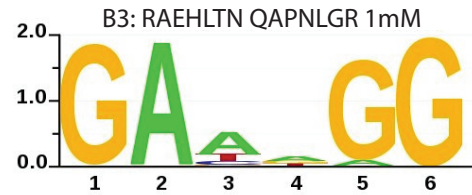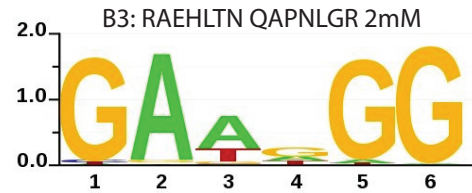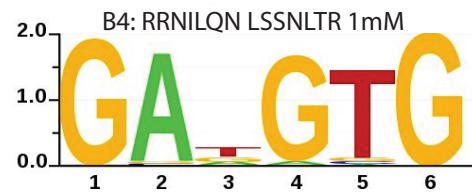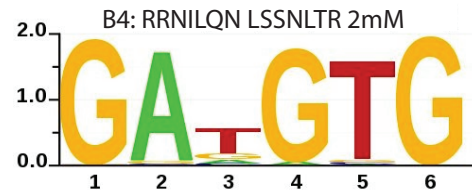



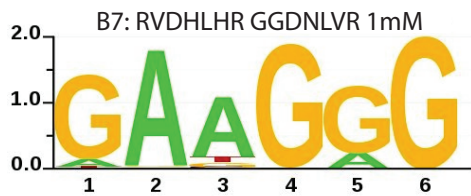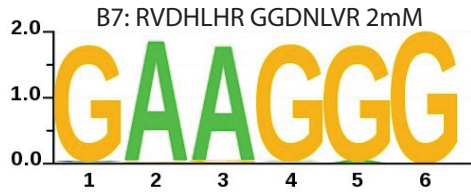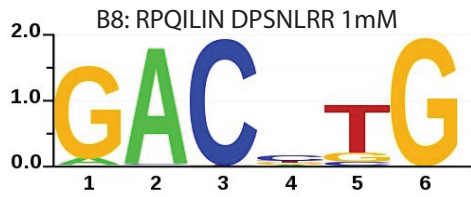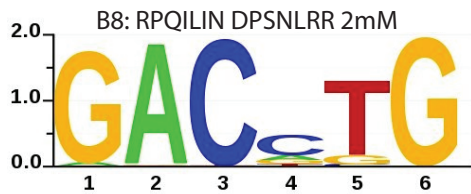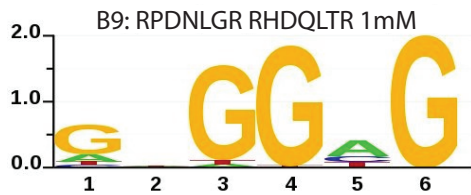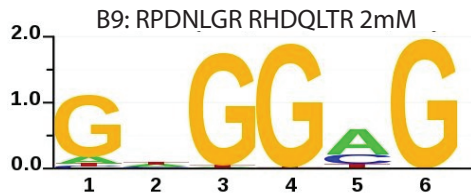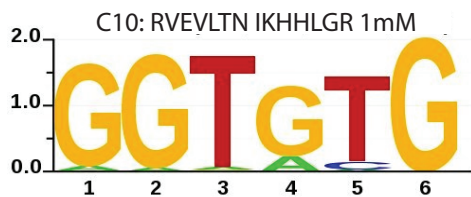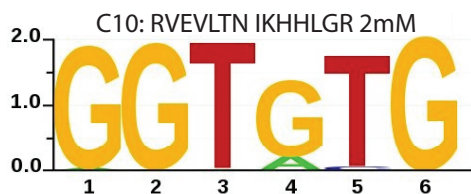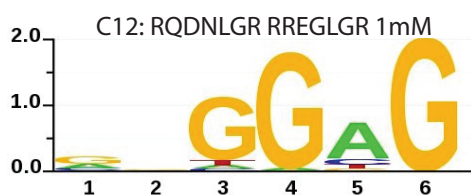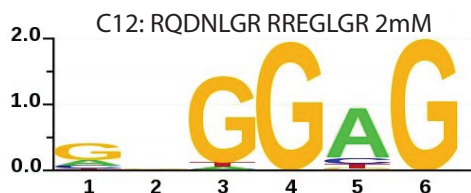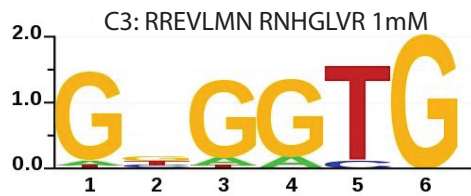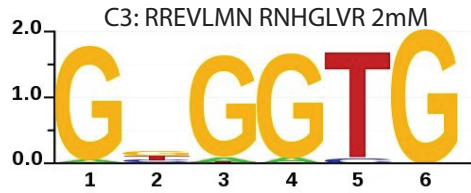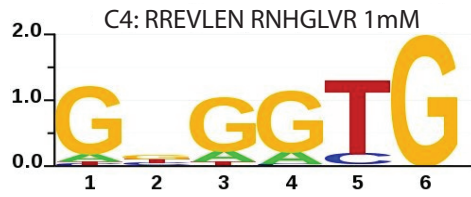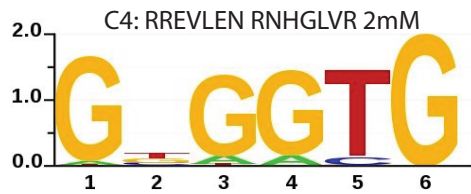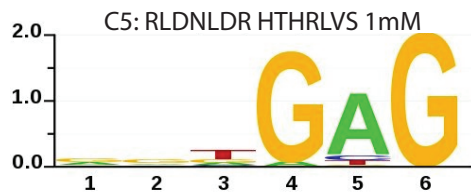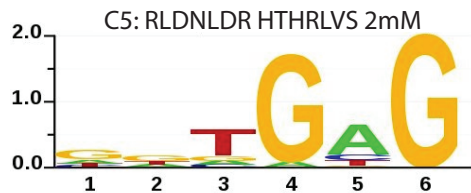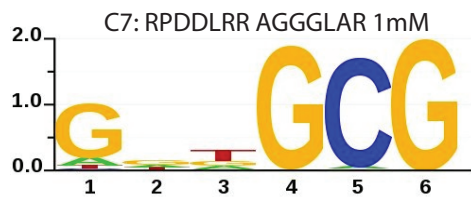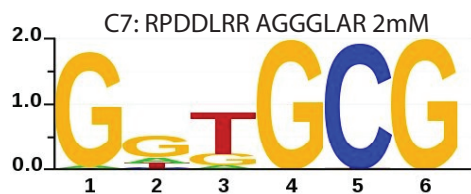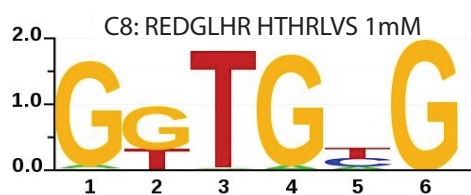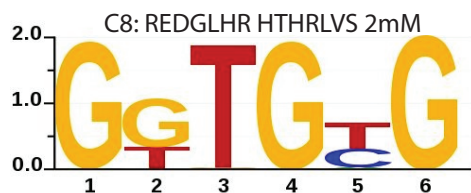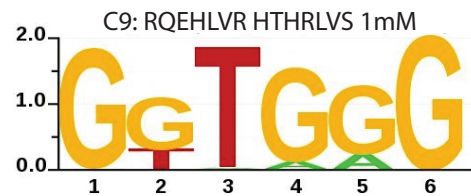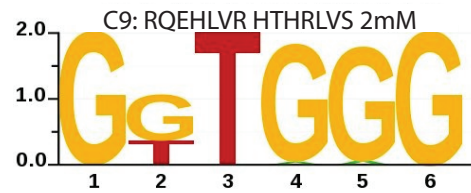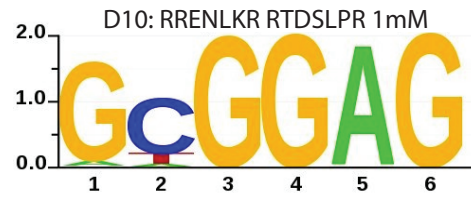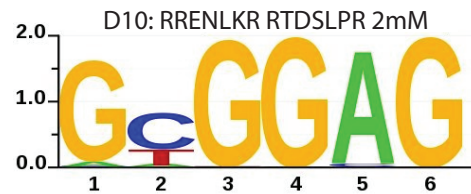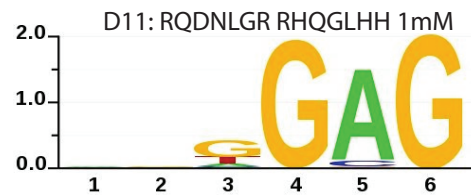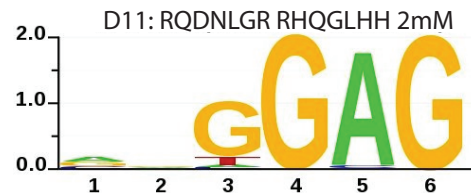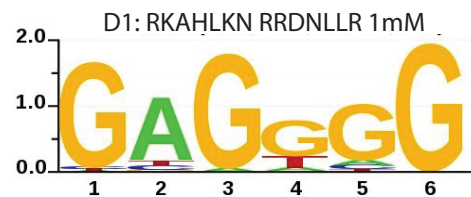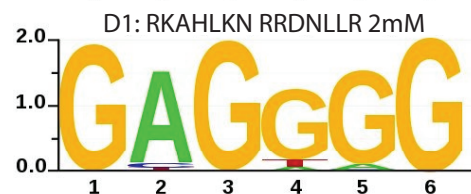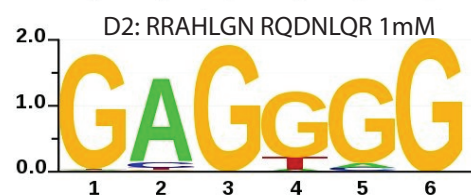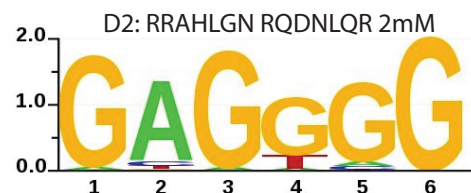

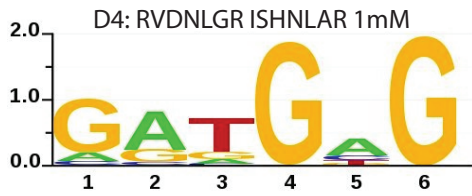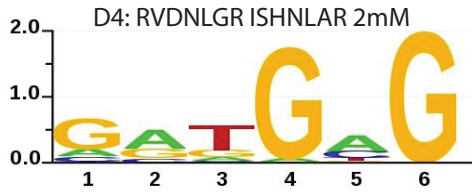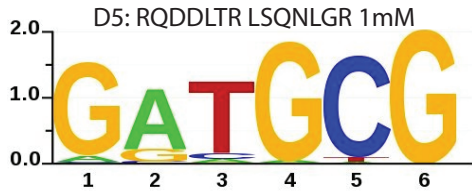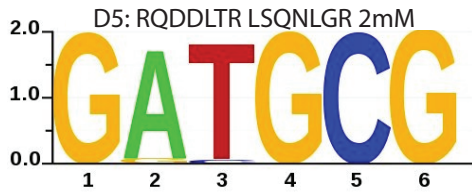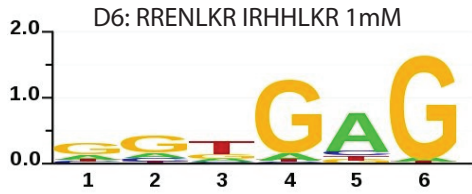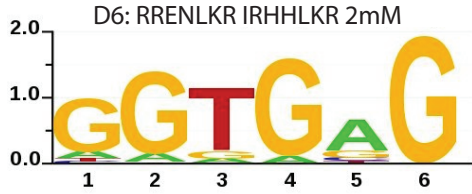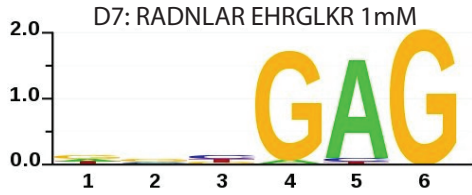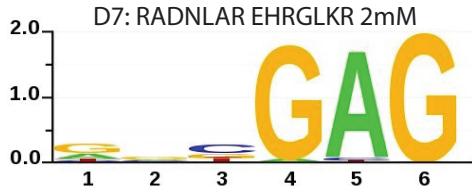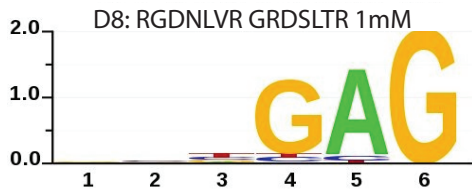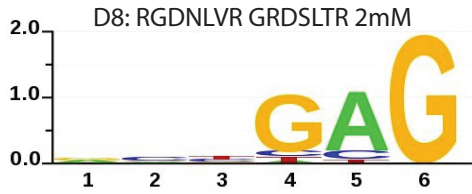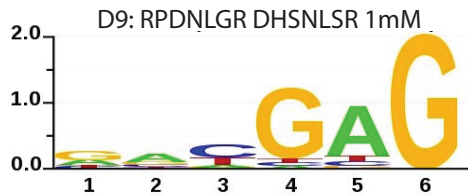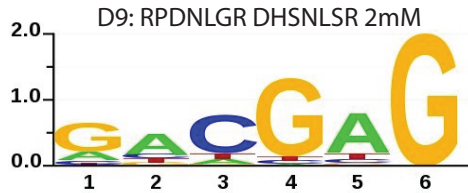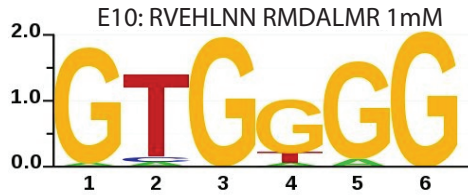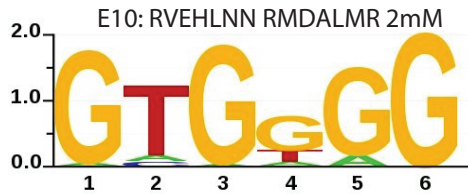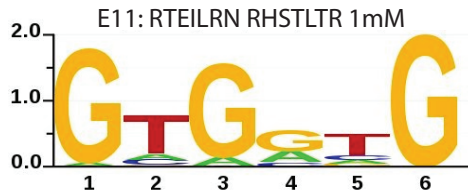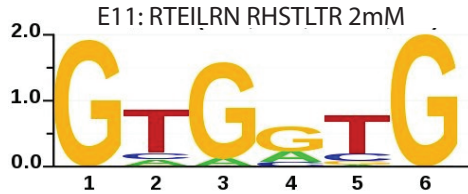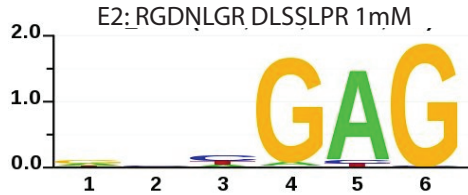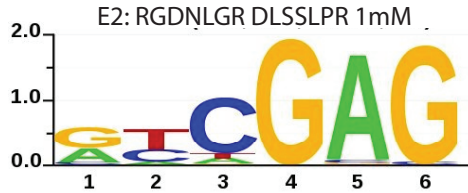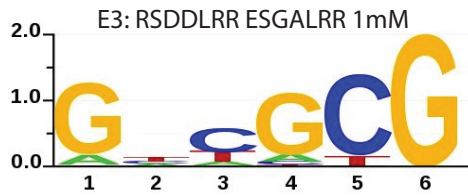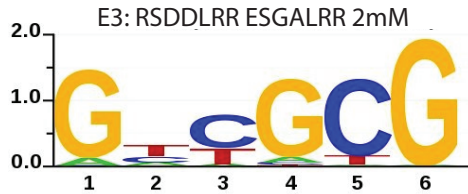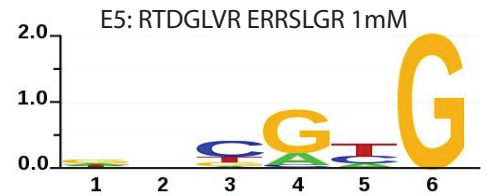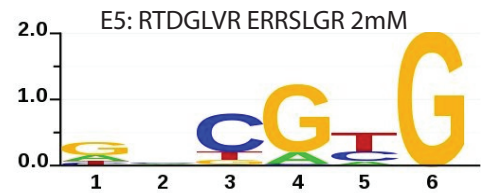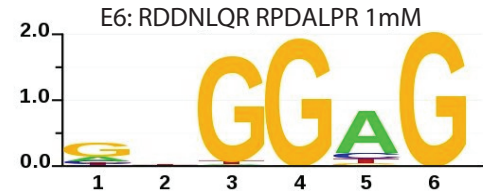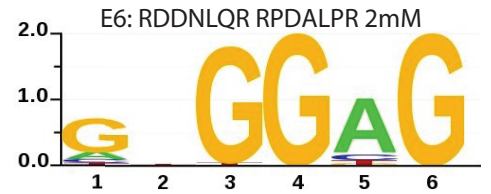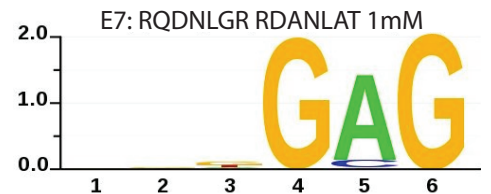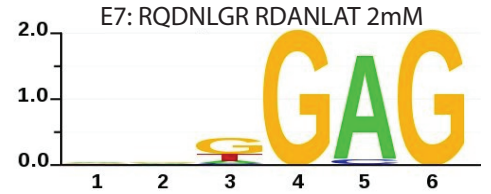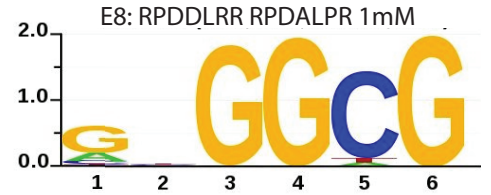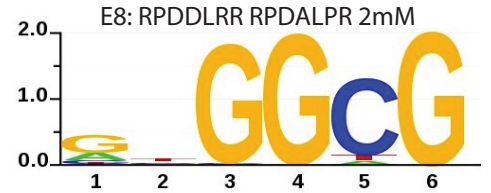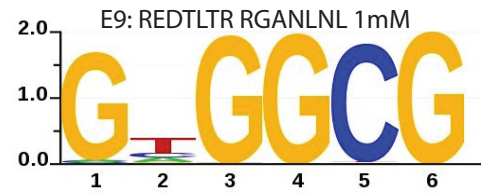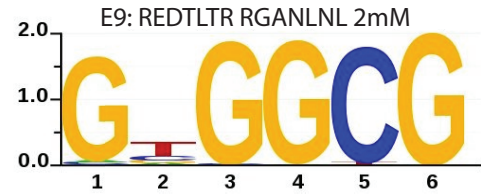



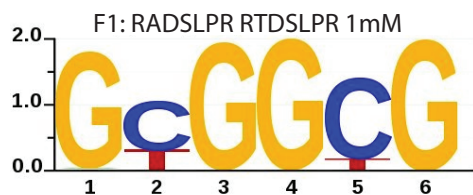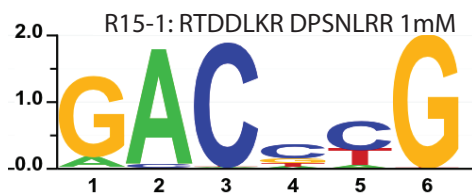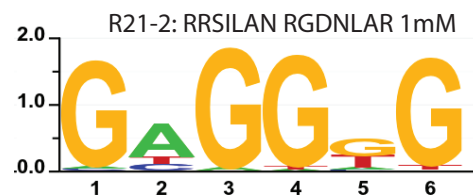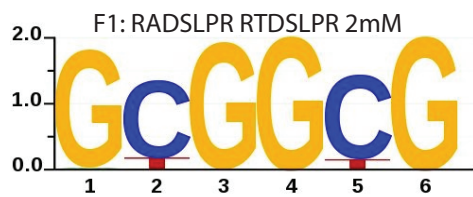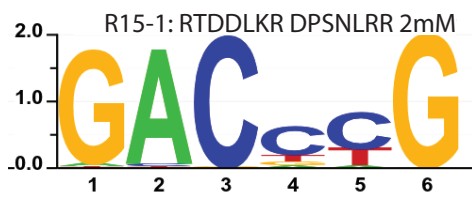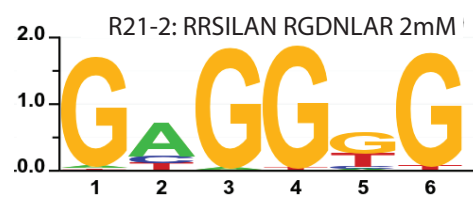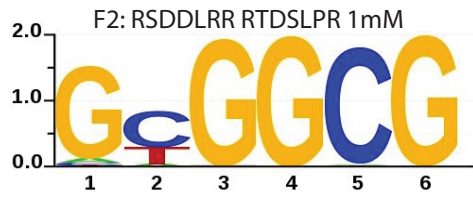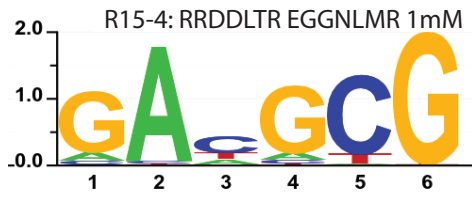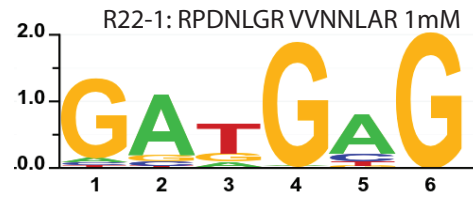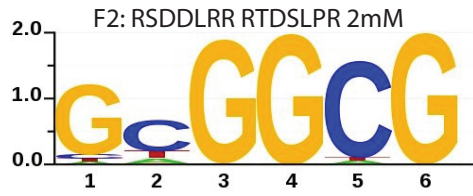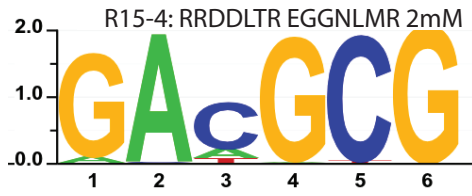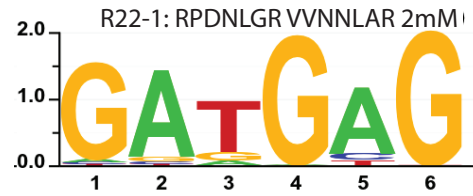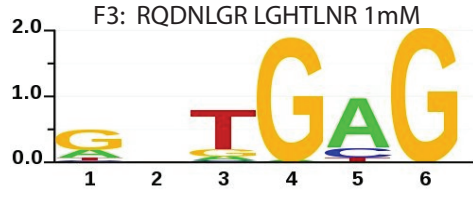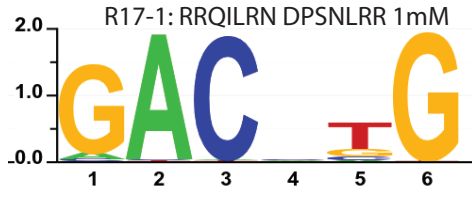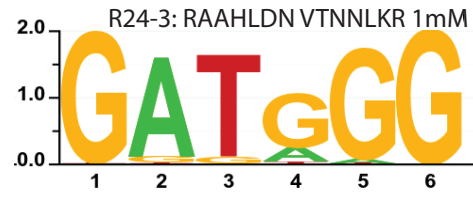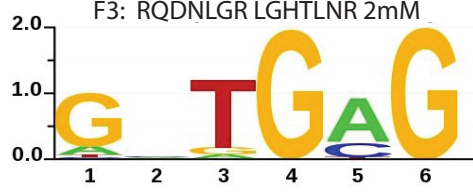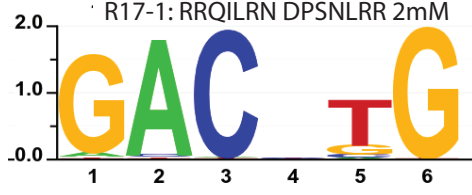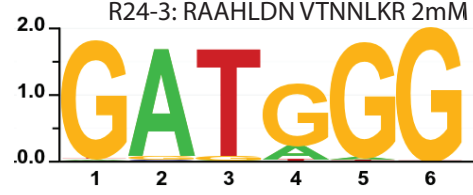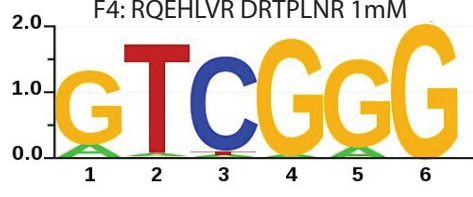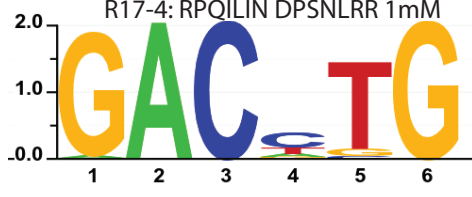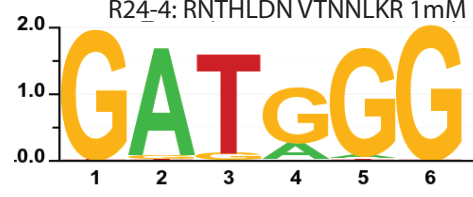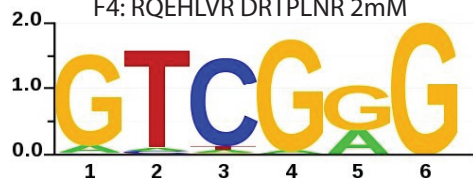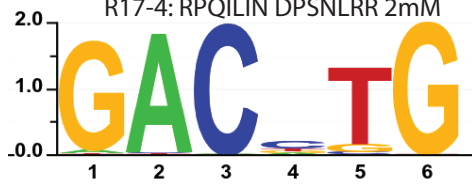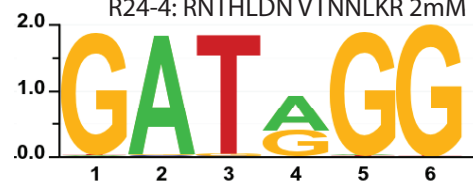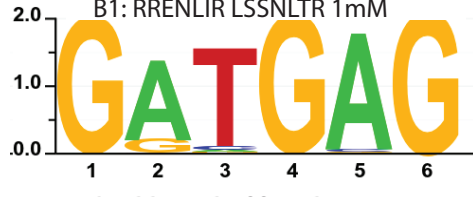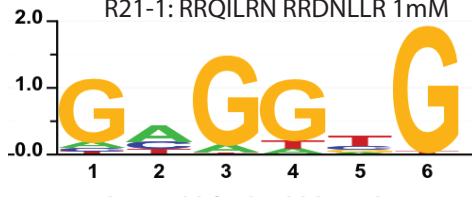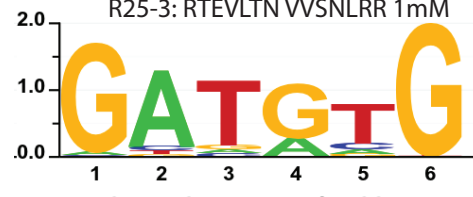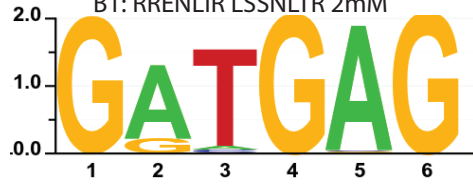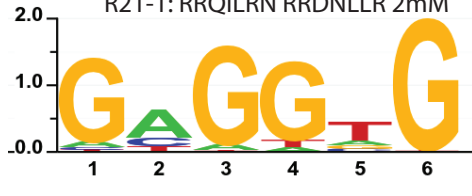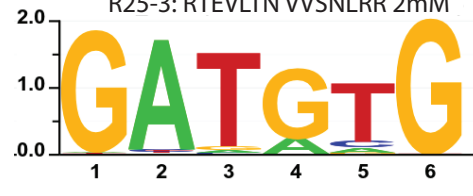

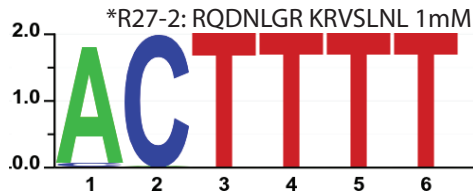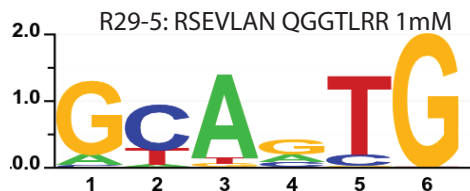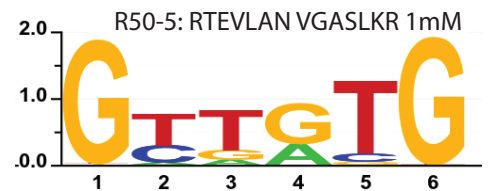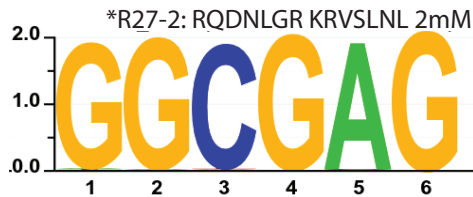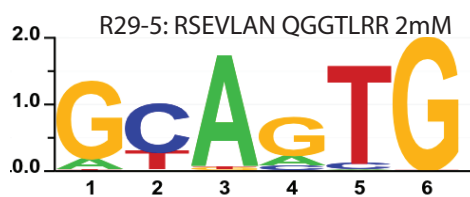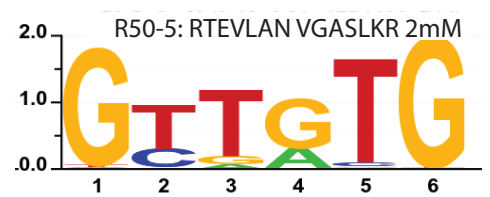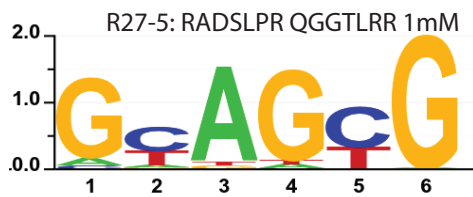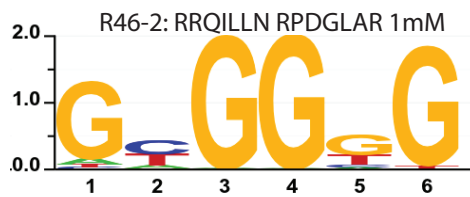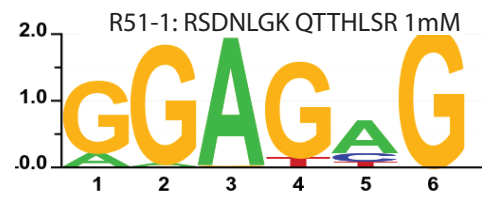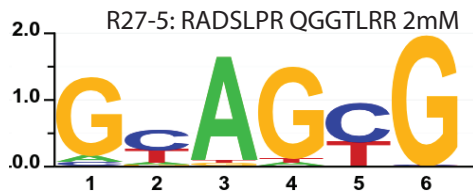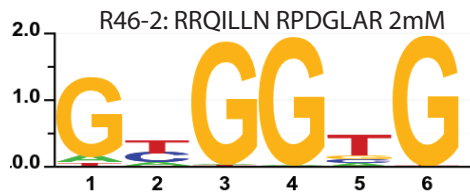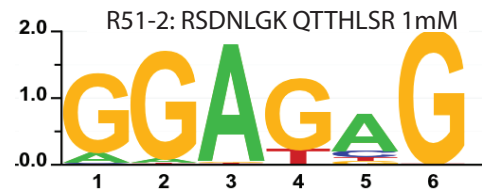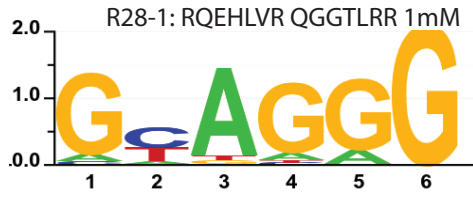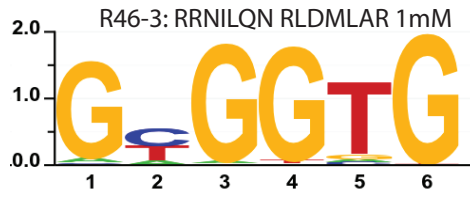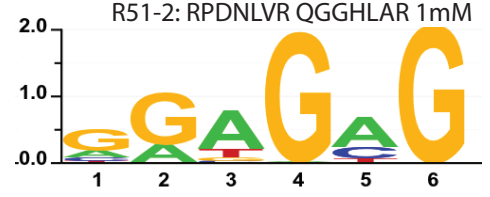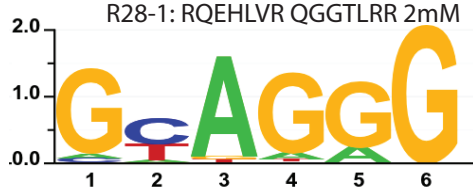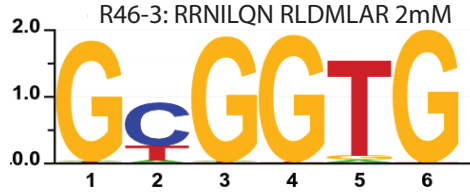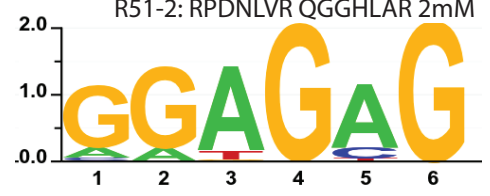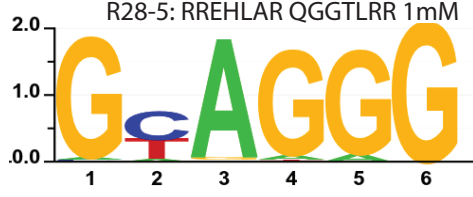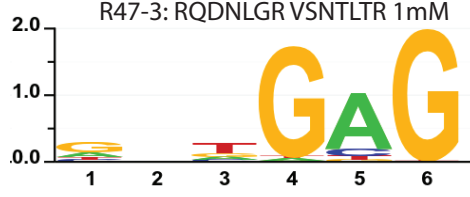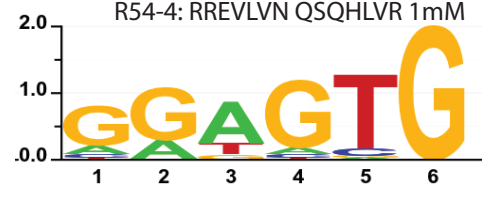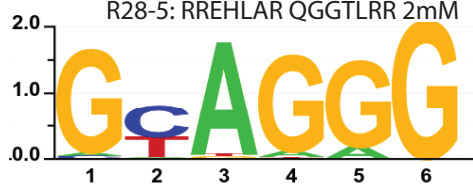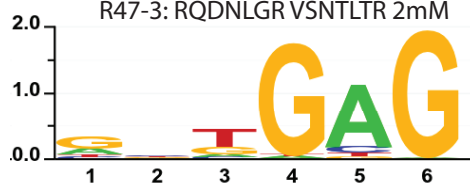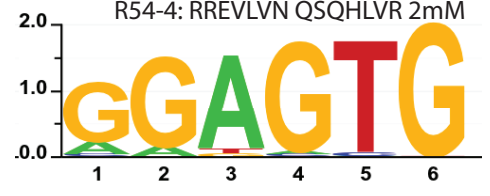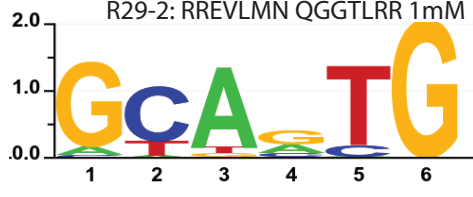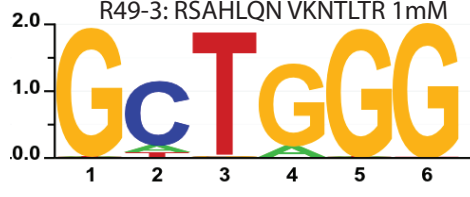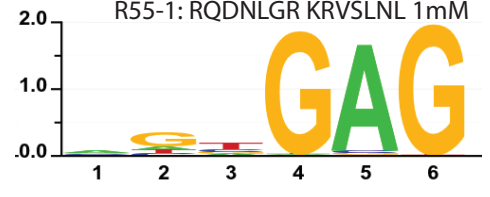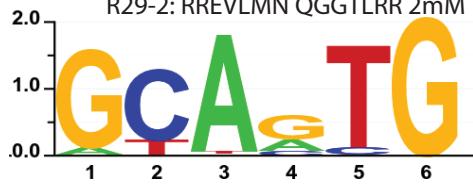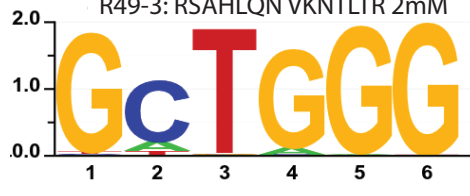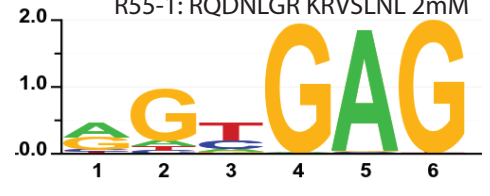





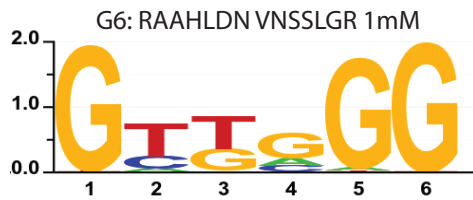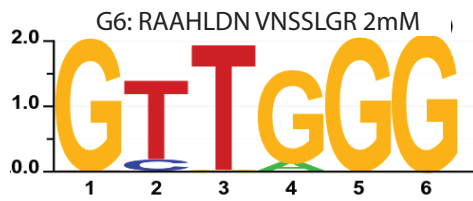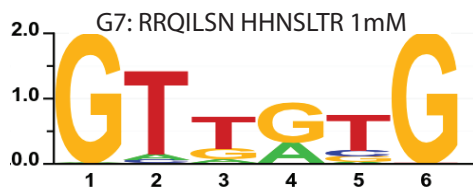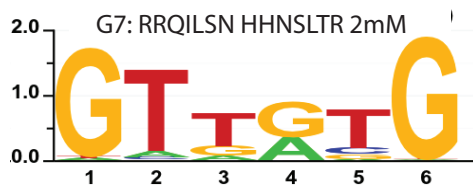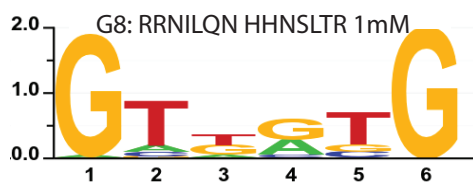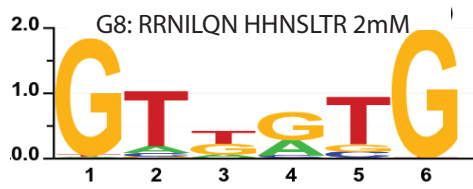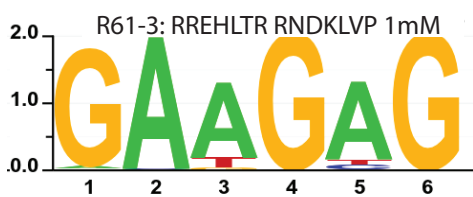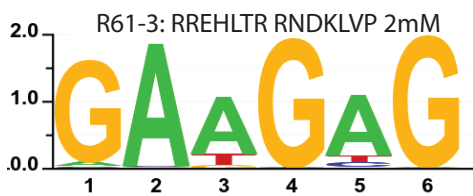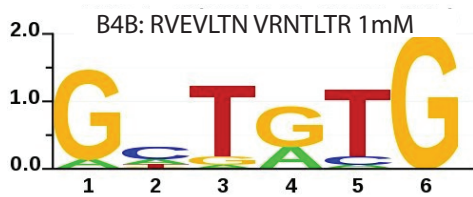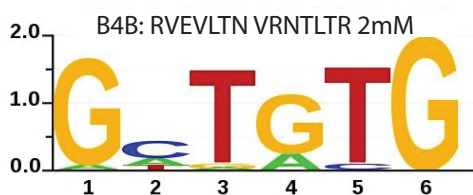

### Supplementary Figure 3.

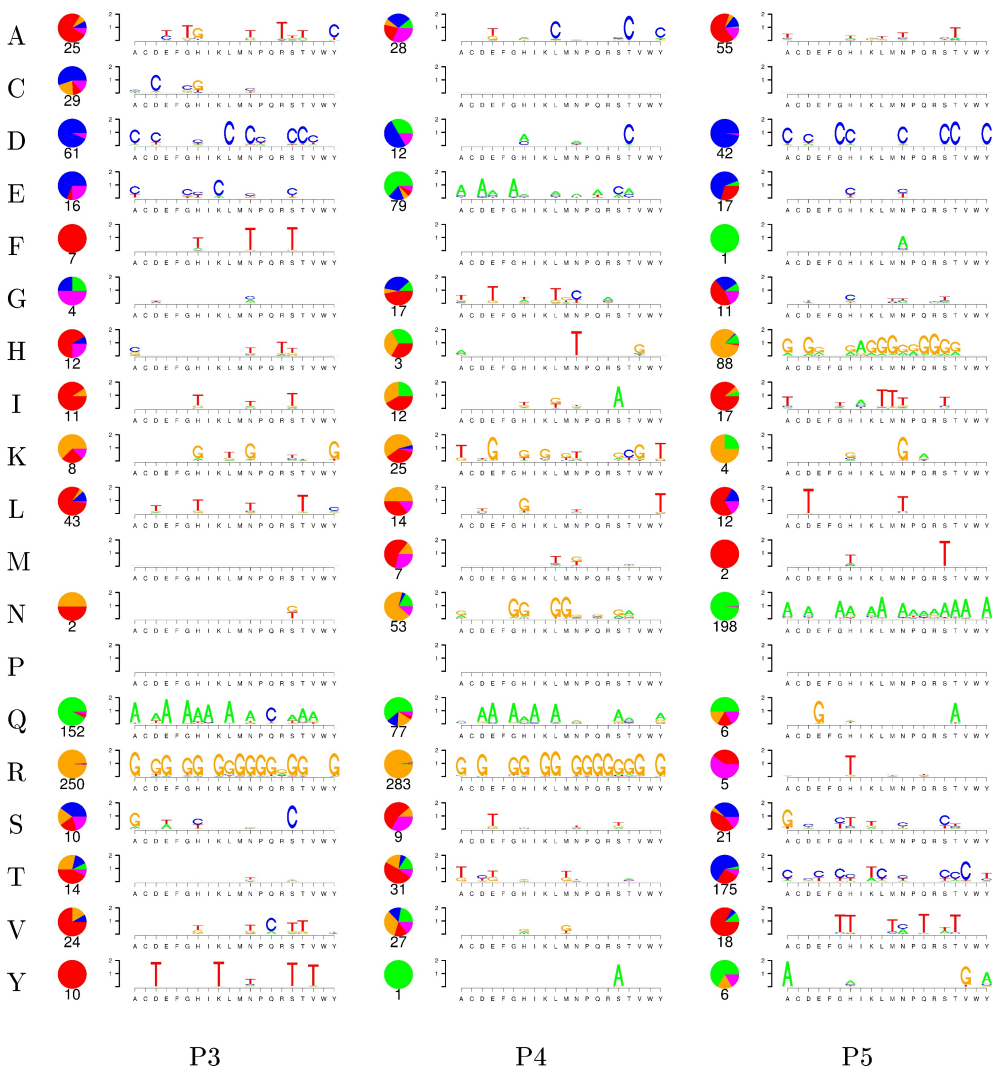

Influence of amino-acid at position 3 of C-terminal finger of a two finger module on base preferences at the positions 3 through 5 (P3-P5) of the six bp binding site. (Left column – P3) Influence of the amino acid at position +3 on the base preferred at position 3 (P3) of the binding site. In the canonical binding mode, the preference of the base at this position is influenced primarily by the amino acid present at position -1 of C-terminal finger (identity indicated to the left of each chart). Numbers of mutants in our database with that amino acid at position -1 of C-terminal finger are given at the bottom of individual pie chart. The different colored regions in pie charts indicate the frequency with which the bases were recovered as a preferred base at P3. Frequencies of occurrences of Ade, Cyt, Gua and Thy are rendered by magenta, yellow, blue and red, respectively. In the complete absence of context dependence, only one color should be observed in pie chart. Amino acids present at position +3 of C-terminal finger are given in X-axis tick labels for each logo. If there is more than one mutant with the same amino acids at position -1 and position +3 of C-terminal finger, then the

frequencies of bases are averaged over all mutants. In summary, each logo indicates relative preference of bases as a function of amino acids at position +3 (as in the X-axis labels) and -1 of C-terminal finger (given on the left most panel). (middle P4 column) Influence of the amino acid at position +3 on base P4. Each logo indicates relative preference of bases as a function of amino acids at position +3 (as in the X-axis labels) of C-terminal finger and at position +6 of N-terminal finger (given on the left most panel). (D) Influence of the amino acid at position +3 on base P5. Each logo indicates relative preference of bases as a function of amino acids at position +3 (as in the X-axis labels) of C-terminal finger and at position +3 of N-terminal finger (given on the left most panel).

### Supplementary Figure 4.

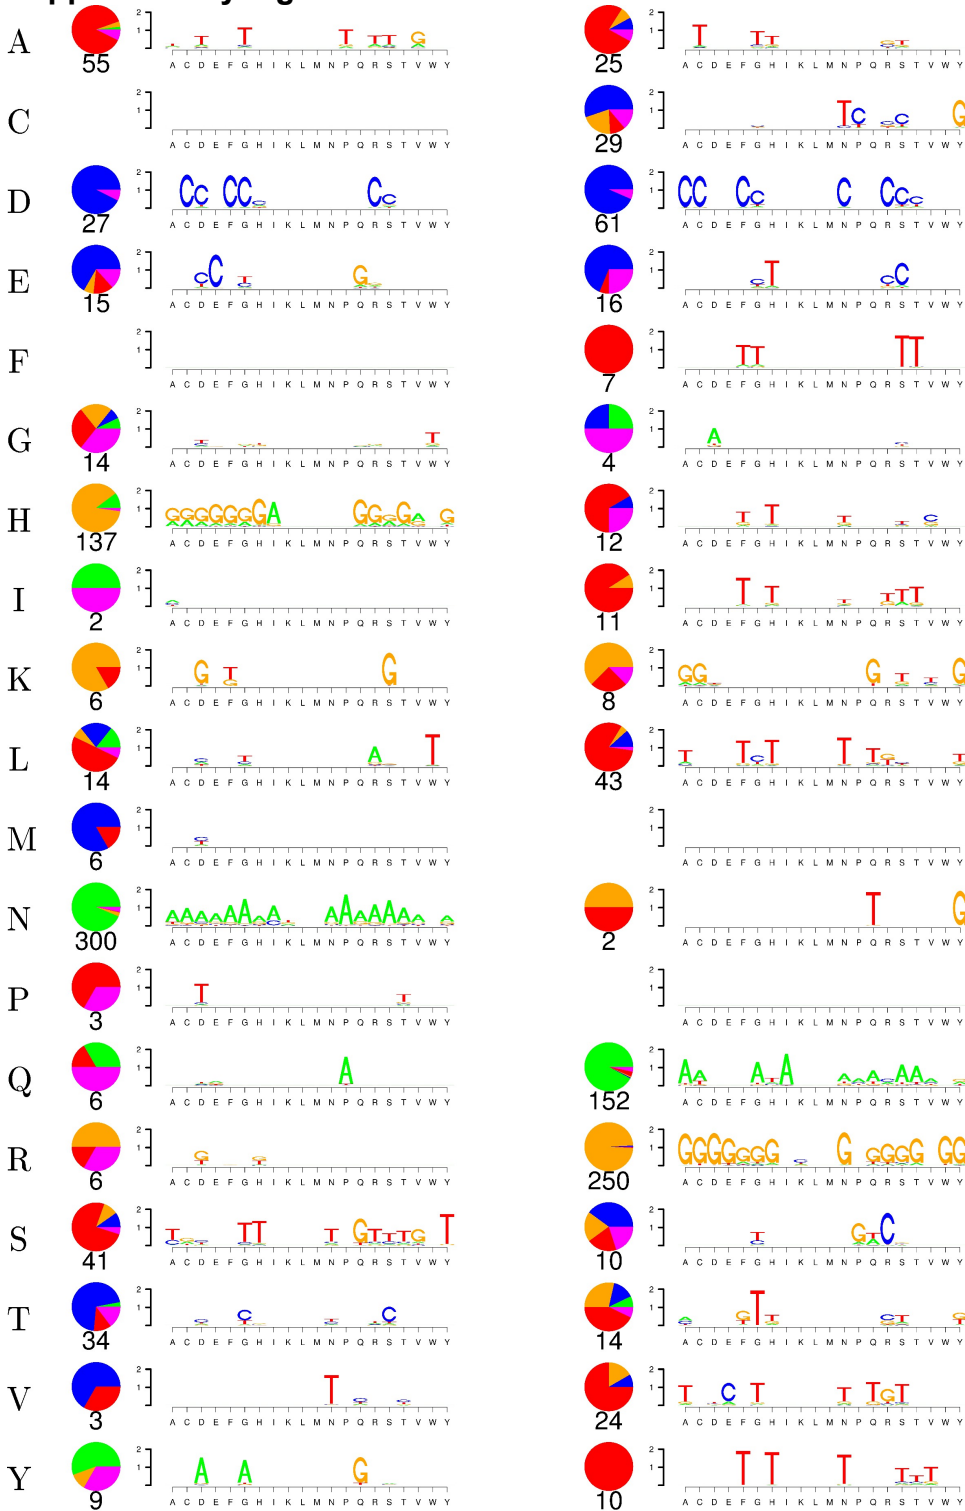

P2

P3

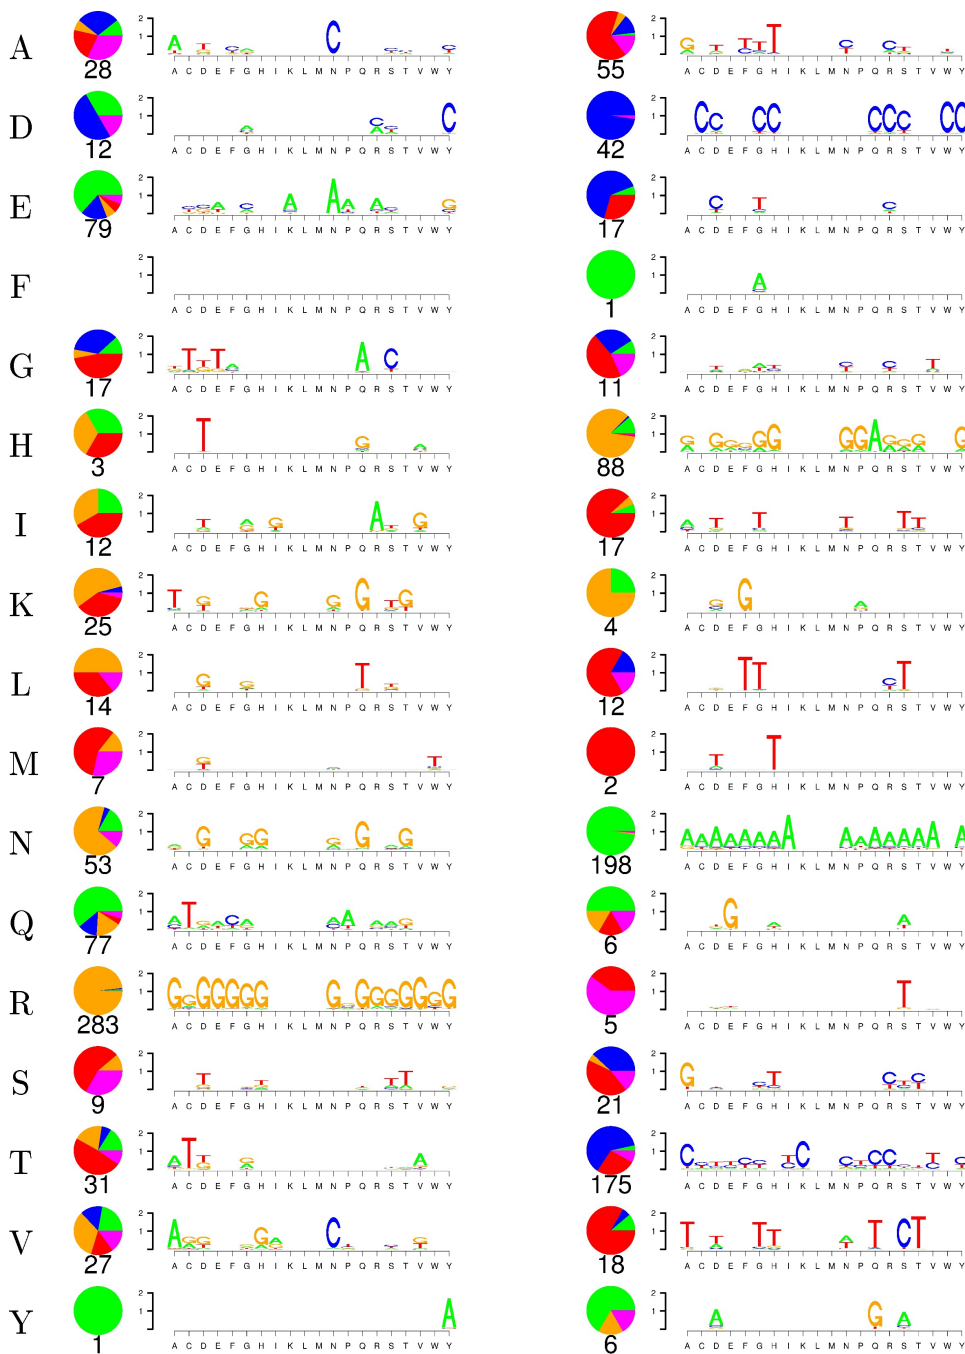

P4

P5

Influence of the amino acid at position +2 of C-terminal finger of a two finger module on base preferences at the positions 2 through 5 (P2-P5) of the six bp binding site. (A) Influence of the amino acid at position +2 on the base preferred at position 2 (P2) of the binding site. In the canonical binding mode, the preference of the base at this position is influenced primarily by the amino acid present at position +3 of C-terminal finger (indicated to the left of each chart). Numbers of mutants in our database with that amino acid at position +3 of C-

terminal finger are given at the bottom of individual pie chart. The different colored regions in pie charts indicate the frequency with which the bases were recovered as a preferred base at P2. Frequencies of occurrences of Ade, Cyt, Gua and Thy are rendered by magenta, yellow, blue and red, respectively. In the complete absence of context dependence, only one color should be observed in pie chart. Amino acids present at position +2 of C-terminal finger are given in X-axis tick labels for each logo. If there is more than one mutant with the same amino acids at position +3 and position +2 of C-terminal finger, then the frequencies of bases are averaged over all mutants. In summary, each logo indicates relative preference of bases as a function of amino acids at position +2 (as in the X-axis labels) and 3 of C-terminal finger (given on the left most panel). (B) Influence of the amino acid at position +2 on base P3. Each logo indicates relative preference of bases as a function of amino acids at position +2 (as in the X-axis labels) and -1 of C-terminal finger (given on the left most panel) (C) Influence of the amino acid at position +2 on base P4. Each logo indicates relative preference of bases as a function of amino acids at position +2 (as in the X-axis labels) of C-terminal finger and at position +6 of N-terminal finger (given on the left most panel). (D) Influence of the amino acid at position 2 on base P5. Each logo indicates relative preference of bases as a function of amino acids at position +2 (as in the X-axis labels) of C-terminal finger and at position +3 of N-terminal finger (given on the left most panel).

Supplementary Figure 5.

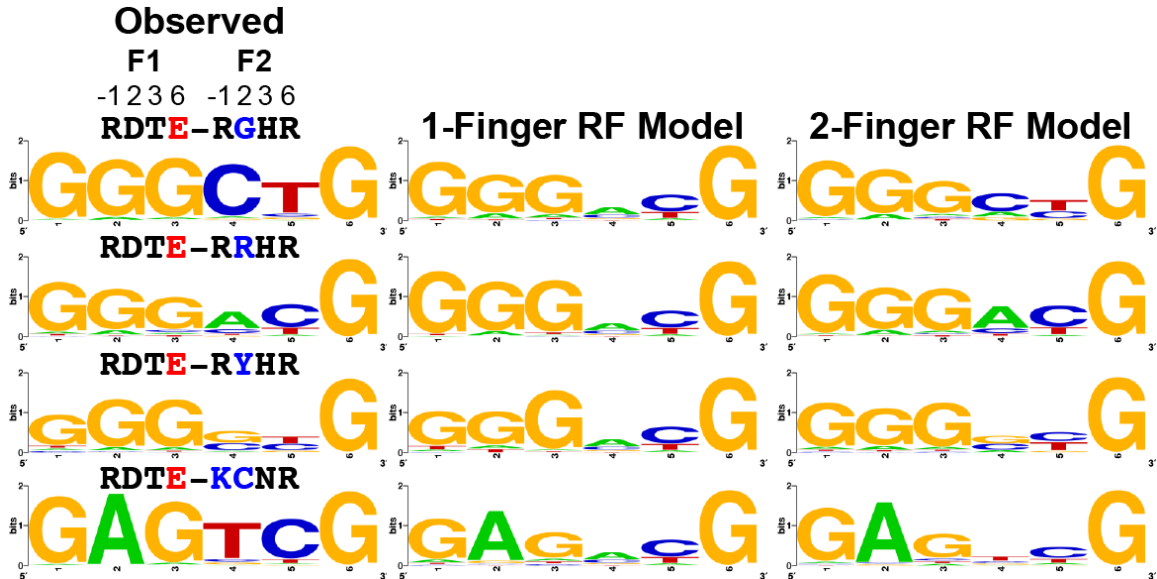

Prediction of context dependent recognition preferences in Figure 3B. The one finger and two finger RF prediction models were used to generate a motif for the four two finger modules characterized in the B1H system (observed). The one finger RF model, which predicts each 3 bp subsite based on the recognition residues at positions -1, +2, +3 & +6, fails to capture the context dependence of recognition at the finger-finger interface. The two finger RF model effectively captures the context dependence. The successful prediction of the recognition motifs by the two finger model is expected since these the specificities of these four two-finger modules were included in the training set for the final RF model.



## Supplementary Figure 6.

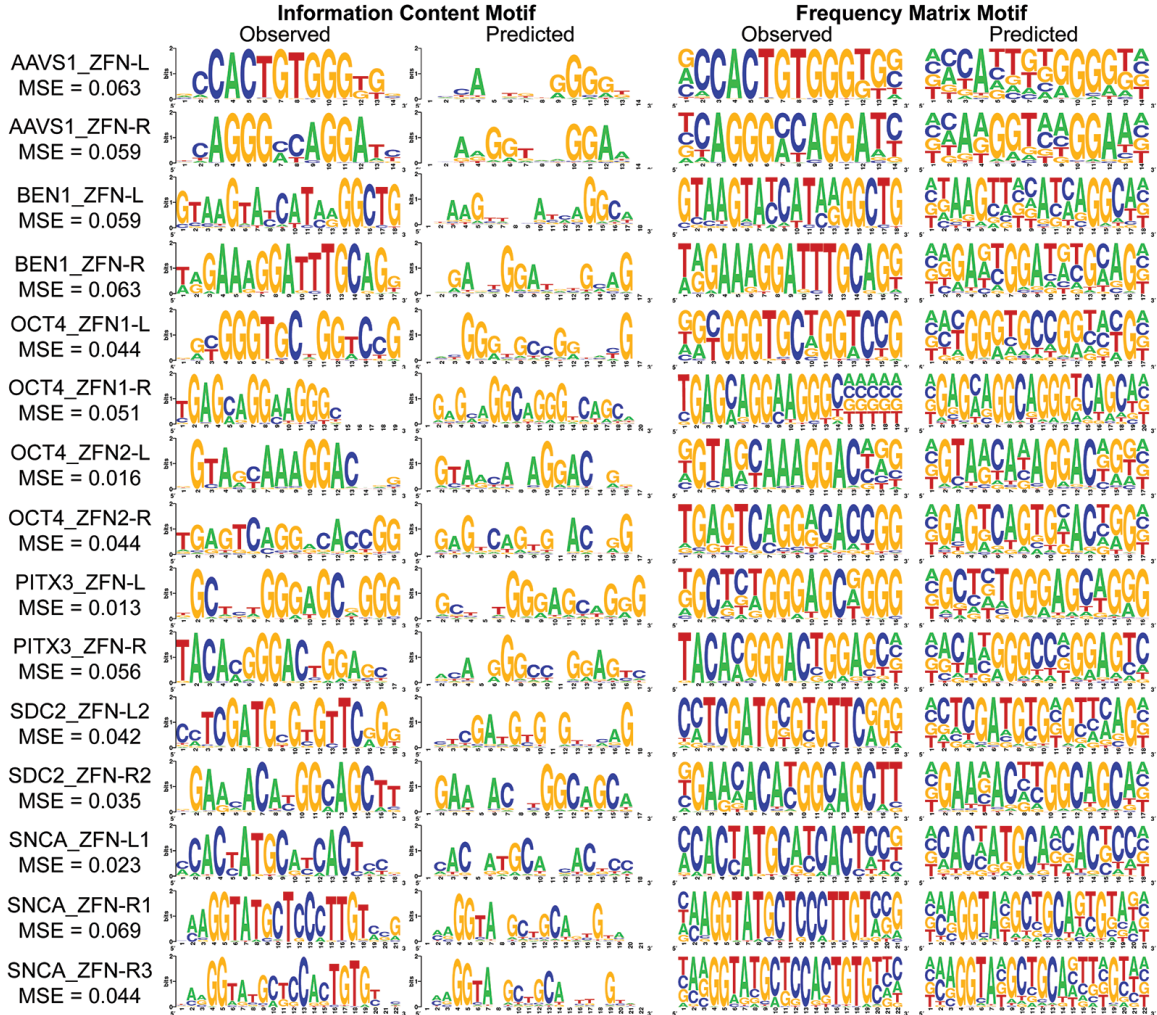

Comparison of the SELEX motifs for various ZFPs (Observed) (26,104-106) and their predicted motifs based on ZFModels (Predicted). The left columns display the motifs as information content, whereas the right columns display the motifs as position frequency plots. One base pair gaps were inserted into a subset of the predicted ZFP motifs based on the presence of non-canonical linkers connecting the fingers (BEN1-ZFN-L F3-F4; Pitx3-ZFN-R F2-F3; SDC2-ZFN-L2 F2-F3; SNCA-L1 F2-F3; SNCA-R1 F5-F6; SNCA-R3 F2-F3 & F5-F6). MSE values for the comparison of the SELEX and predicted motif are displayed above each predicted motif.
